# Supplementary material
Source: ML conference proceedings conference paper supplement (https://proceedings.mlr.press/v108/zrnic20a.html)
Supplement: Supplementary file 2 [file zrnic20a-supp.zip]

Archive with 22 entries (21 files):
- 1261-supp/
- __MACOSX/._1261-supp
- 1261-supp/.DS_Store
- __MACOSX/1261-supp/._.DS_Store
- 1261-supp/base.mplstyle
- __MACOSX/1261-supp/._base.mplstyle
- 1261-supp/requirements.txt
- __MACOSX/1261-supp/._requirements.txt
- 1261-supp/online.py
- __MACOSX/1261-supp/._online.py
- 1261-supp/run.sh
- __MACOSX/1261-supp/._run.sh
- 1261-supp/README.md
- __MACOSX/1261-supp/._README.md
- 1261-supp/utils.py
- __MACOSX/1261-supp/._utils.py
- 1261-supp/rename.sh
- __MACOSX/1261-supp/._rename.sh
- 1261-supp/1261-supp.pdf
- __MACOSX/1261-supp/._1261-supp.pdf
- 1261-supp/creditcard.py
- __MACOSX/1261-supp/._creditcard.py
