# Supplementary material
Source: ML conference proceedings conference paper supplement (https://proceedings.mlr.press/v108/zrnic20a.html)
Supplement: Supplementary file 2 [file zrnic20a-supp.zip › 1261-supp/base.mplstyle]

mathtext.fontset : cm

font.family : STIXGeneral

figure.subplot.left : 0.1
figure.subplot.right : 0.98
figure.subplot.bottom : 0.16
figure.subplot.top : 0.7
figure.subplot.wspace : 0.33
figure.figsize : 8, 4

savefig.dpi : 200

axes.labelsize : 24
axes.grid : True

lines.linewidth : 3

xtick.labelsize : 16
ytick.labelsize : 16

legend.loc : upper center
legend.fontsize : 16
#legend.borderpad : 0.2
#legend.columnspacing : 1.0
