# Supplementary material
Source: ML conference proceedings conference paper supplement (https://proceedings.mlr.press/v108/zrnic20a.html)
Supplement: Supplementary file 2 [file zrnic20a-supp.zip › 1261-supp/requirements.txt]

matplotlib==3.1.0
numpy==1.16.4
pandas==0.25.1
scipy==1.3.0
sklearn==0.0
tqdm==4.32.2
